# Supplementary material for: Interactions of Amino Group Functionalized Tetraphenylvinyl and DNA: A Label-Free “On-Off-On” Fluorescent Aptamer Sensor toward Ampicillin
Source: MDPI journal article supplement (doi:10.3390/bios13050504), 2023-04-27
Supplement: s1 [file s1]

## Supporting Information

# Interactions of Amino Group Functionalized Tetraphenylvinyl and DNA: A Label-Free “On-Off-On” Fluorescent Aptamer Sensor toward Ampicillin

Weifu Geng <sup>1,†</sup>, Yan Feng <sup>2,†</sup>, Yu Chen <sup>2</sup>, Xin Zhang <sup>1</sup>, Haoyi Zhang <sup>2</sup>, Fanfan Yang <sup>2</sup>  
and Xiuzhong Wang <sup>1,2,\*</sup>

<sup>1</sup> College of Plant Health and Medicine, Qingdao Agricultural University, Qingdao 266109, China; gwf17854221211@163.com (W.G.)

<sup>2</sup> College of Chemistry and Pharmaceutical Sciences, Qingdao Agricultural University, Qingdao 266109, China

\* Correspondence: xzwang@qau.edu.cn; Tel.: +86-532-58957442

† These authors contributed equally to this work.

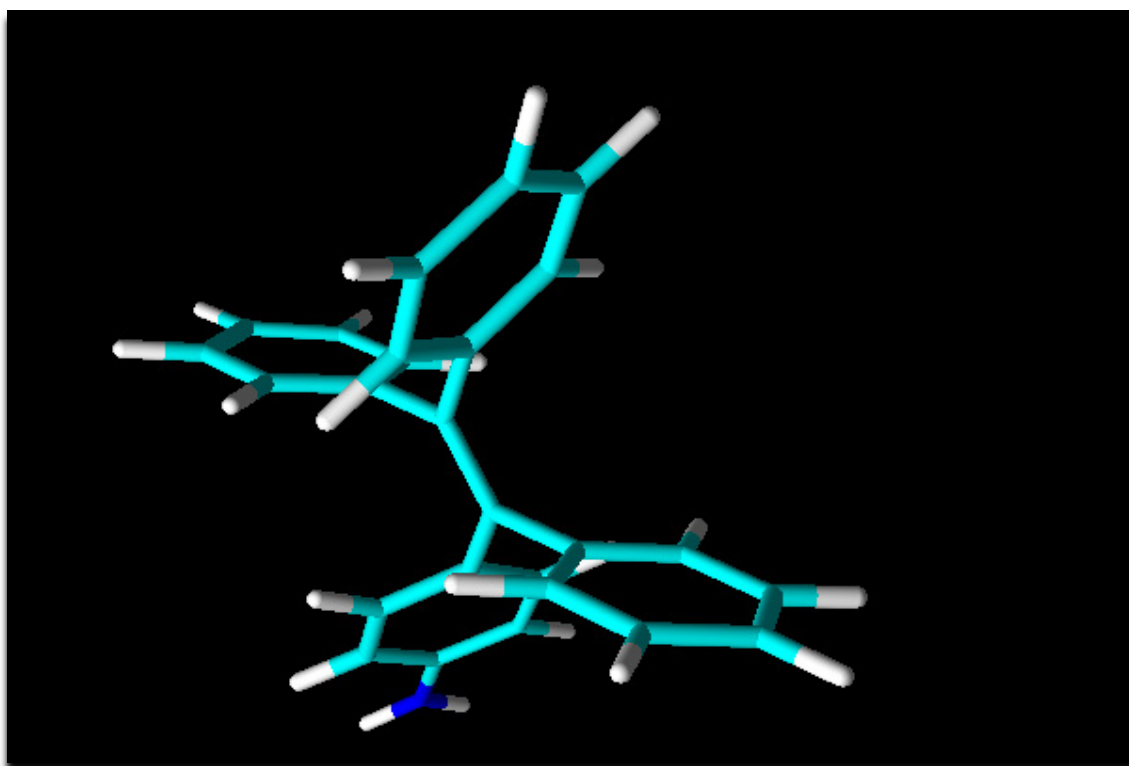

Figure S1. Molecule structure of TPE-Am

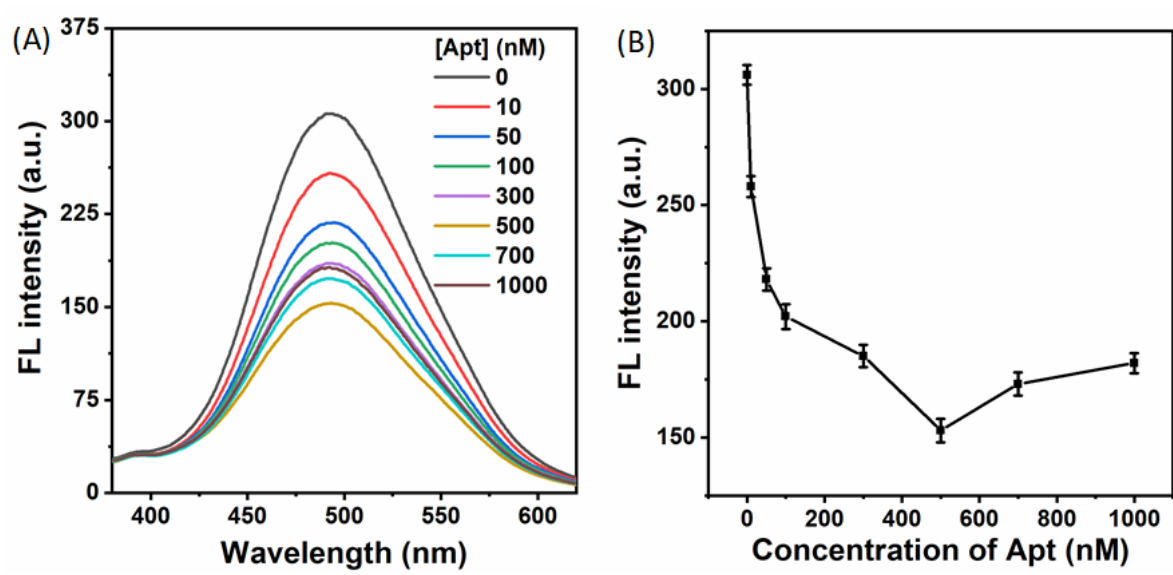

Figure S2. The effect of aptamer concentration

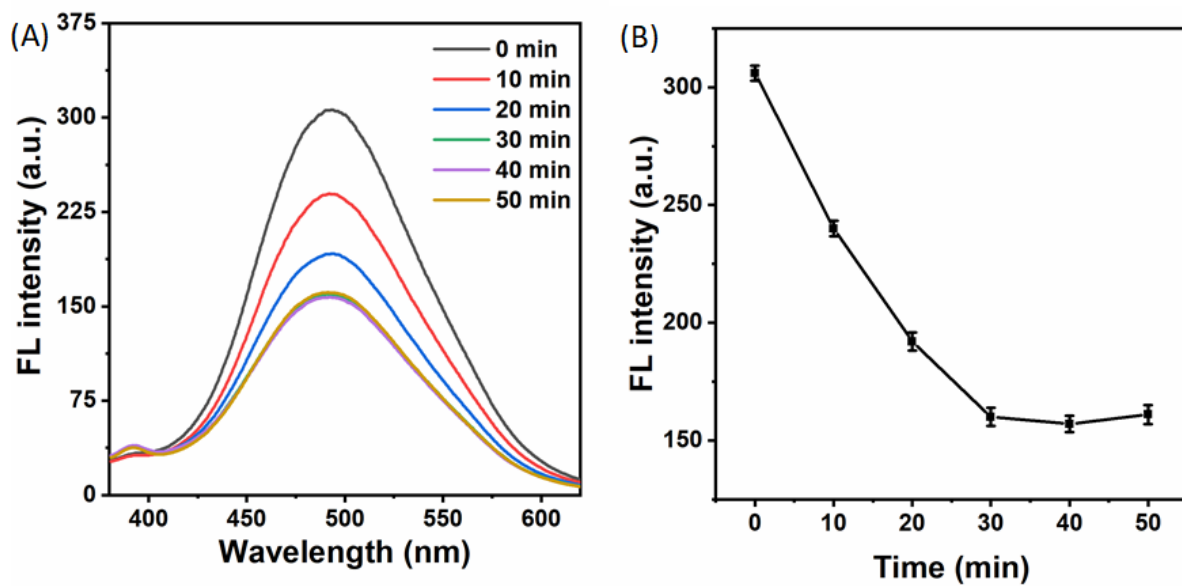

**Figure S3.** The effect of incubation time for TPE-Am/Aptamer

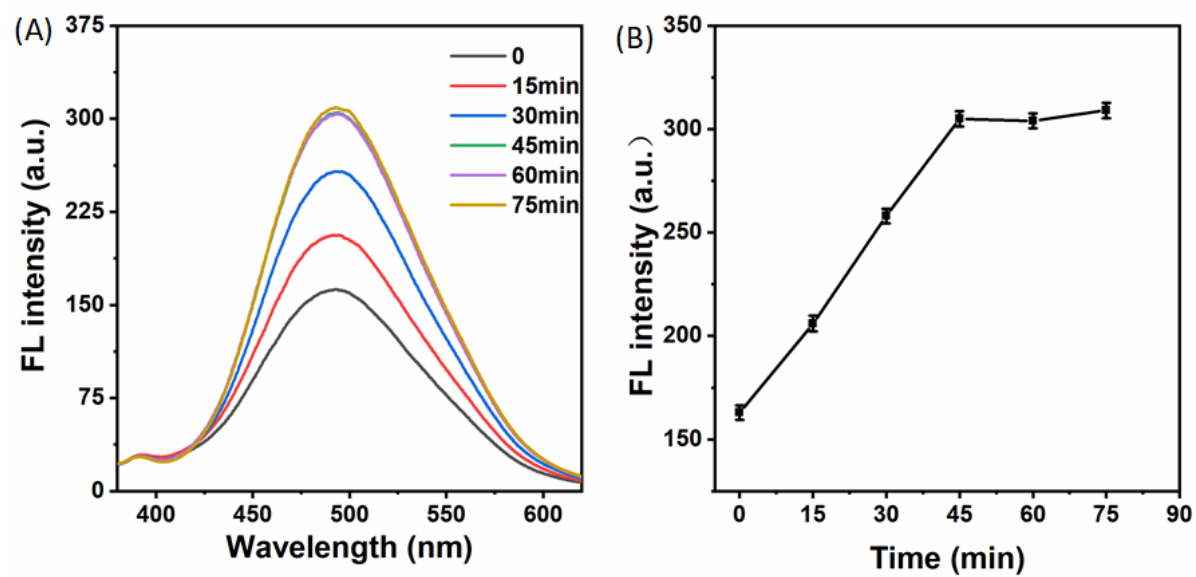

**Figure S4.** The effect of incubation time for TPE-Am/Aptamer/AMP

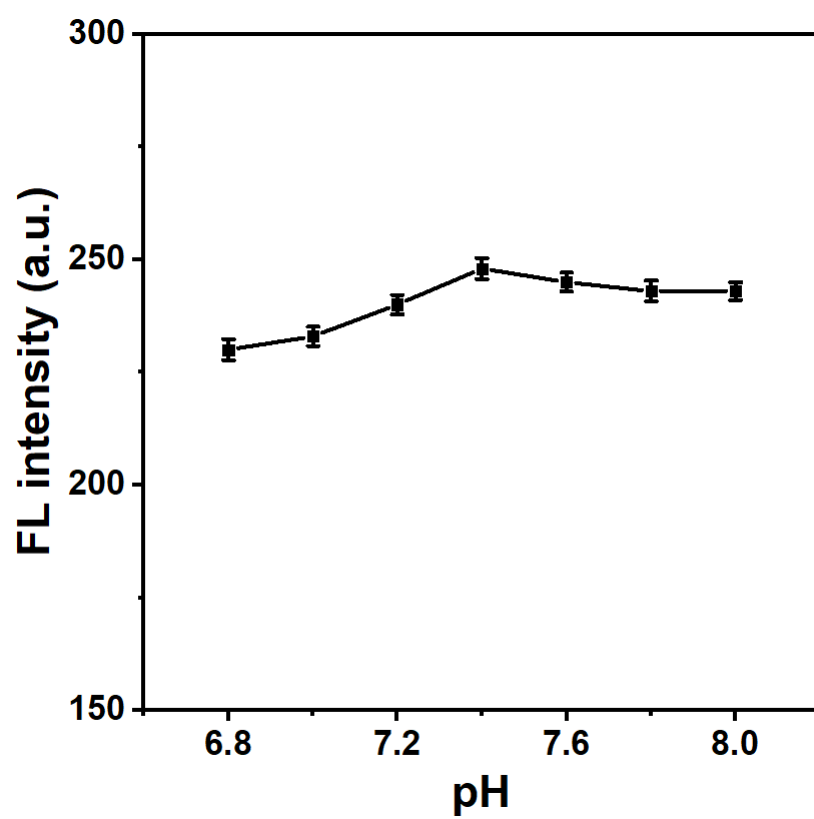

**Figure S5.** The effect of pH to the response of sensing strategy

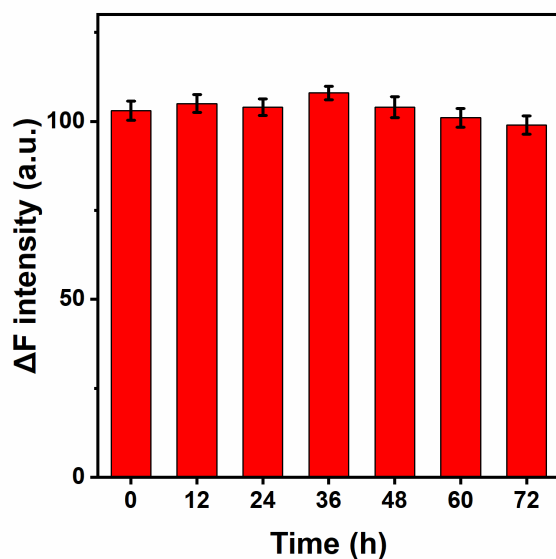

**Figure S6.** Repeatability and stability test of this aptasensor. The concentration of AMP is 10 nM.

**Table S1. Comparison of vary detection methods for ampicillin.**

| Analysis methods           | LOD ( $\mu\text{M}$ ) | Linear range ( $\mu\text{M}$ ) | References |
|----------------------------|-----------------------|--------------------------------|------------|
| Fluorescence method        | 0.035                 | 0.75–40                        | [5]        |
| Fluorescence method        | 0.700                 | 0–60                           | [6]        |
| Electrochemical aptasensor | 0.0330                | 0.1–1,000                      | [7]        |
| Fluorescent aptasensor     | 0.0260                | 0.1–100                        | [8]        |
| Photochemical aptasensor   | $9.3 \times 10^{-5}$  | $1 \times 10^{-4}$ –0.2        | [9]        |
| Chemiluminescence          | 0.261                 | 0.4–4.0                        | [10]       |
| Chemiluminescence          | 0.014                 | 0.020–1.0                      | [12]       |
| Electrochemical aptasensor | 1.0000                | 5–5,000                        | [13]       |
| Surface plasmon resonance  | 1.000                 | 2.5–1,000                      | [14]       |
| Fluorescence aptasensor    | $6 \times 10^{-5}$    | $2 \times 10^{-4}$ –0.01       | This study |

**Table S2.** The recovery and RSD for the detection of AMP in river water samples.

| No. | Measured<br>(nM) <sup>[a]</sup> | Added<br>(nM) | Found<br>(nM) | Mean recovery<br>(%) | RSD <sup>[b]</sup><br>(%, n=3) |
|-----|---------------------------------|---------------|---------------|----------------------|--------------------------------|
| 1   | ND                              | 0.20          | 0.206         | 102.85               | 4.84                           |
| 2   | ND                              | 0.60          | 0.598         | 99.67                | 3.34                           |
| 3   | ND                              | 1.00          | 0.990         | 99.60                | 4.41                           |

[a] "ND" means that the concentration of AMP in river water samples is too low to be detected.

[b] RSD (relative standard deviation) was calculated from three separate experiments.
